# Supplementary material
Source: Research Square preprint supplement (doi:10.21203/rs.3.rs-9279202/v1)
Supplement: Supplementary file 1 [file 2ff257cfd0dd81d88621cef9.docx]

**Supplementary for:**

**Meta-transcriptomic profiling of *Ixodes ricinus and Ixodes persulcatus* ticks reveals diverse RNA viromes, community structuring, and emerging viral lineages**

Theophilus Yaw Alale1, Jesse Mänttäri1, Heidi Viitaniemi1, Mikhail Ozerov1,2, Miguel Baltazar-Soares1, Jani J. Sormunen1,3, Eero J. Vesterinen1,2

1. Department of Biology, University of Turku, Turku, Finland.
2. Bioname Ltd, Itäinen Pitkäkatu 2, 20520, Turku, Finland
3. School of Medical, Molecular and Forensic Sciences, Murdoch University, Perth, Western Australia, Australia

This supplement contains the following figures and tables:

Contents

[Figure S1. Tick read removal efficiency. 2](#_Toc225700183)

[Figure S2. Tick read removal efficiency. 2](#_Toc225700184)

[Figure S3. Non-tick read QC. 3](#_Toc225700185)

[Figure. S4. Mean relative abundance 4](#_Toc225700186)

[Figure S5. Heatmap of viral taxa across individual tick samples. 4](#_Toc225700187)

[Table S1. Viruses and their family names. 5](#_Toc225700188)

[Table S2: Assembly and contig length distribution. 7](#_Toc225700189)

[Table S3. PERMANOVA (adonis) to test if communities differ by species/sex. 7](#_Toc225700190)

[Table S4. Differential abundance analysis of tick-associated RNA viruses between Ixodes ricinus and Ixodes persulcatus. 8](#_Toc225700191)


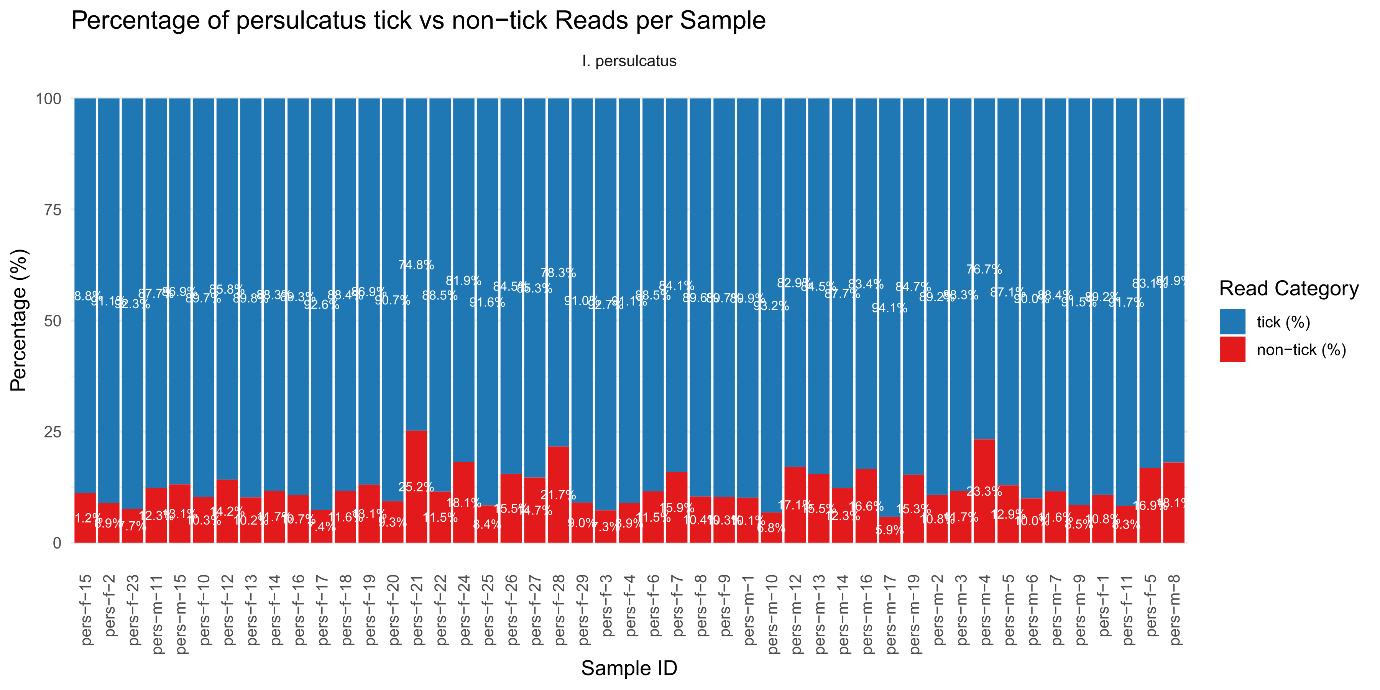


## Fig S1. Tick read removal efficiency.

Proportion of mapped and unmapped reads in *Ixodes persulcatus* samples. Bar plots illustrating the percentage of reads mapped to the *I. persulcatus* reference genome and unmapped reads across individual tick samples. Unmapped reads were retained for subsequent viral discovery and taxonomic classification.


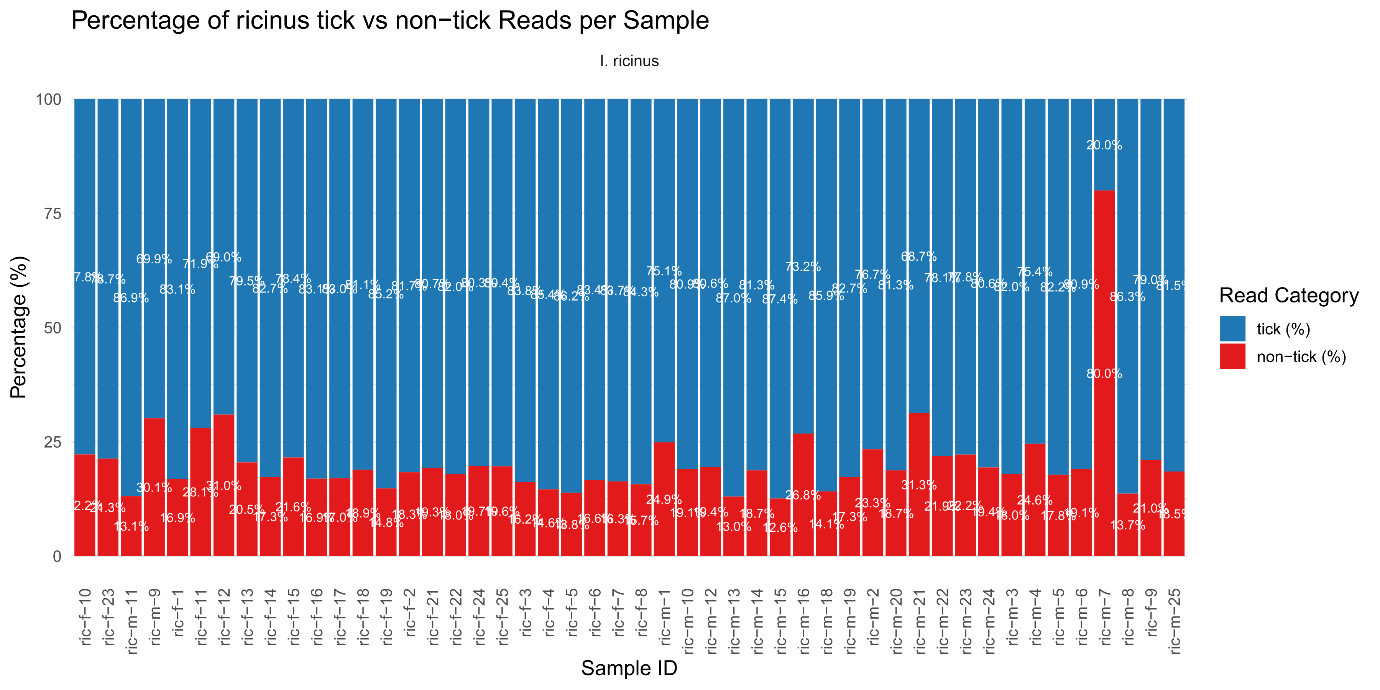


## Fig S2. Tick read removal efficiency.

Proportion of mapped and unmapped reads in *Ixodes ricinus* samples. Bar plots showing the percentage of sequencing reads mapped to the *I. ricinus* reference genome (host reads) and unmapped reads retained for downstream metatranscriptomic analysis across individual tick samples. Unmapped reads represent non-host sequences, including viral, microbial, and residual environmental RNA.


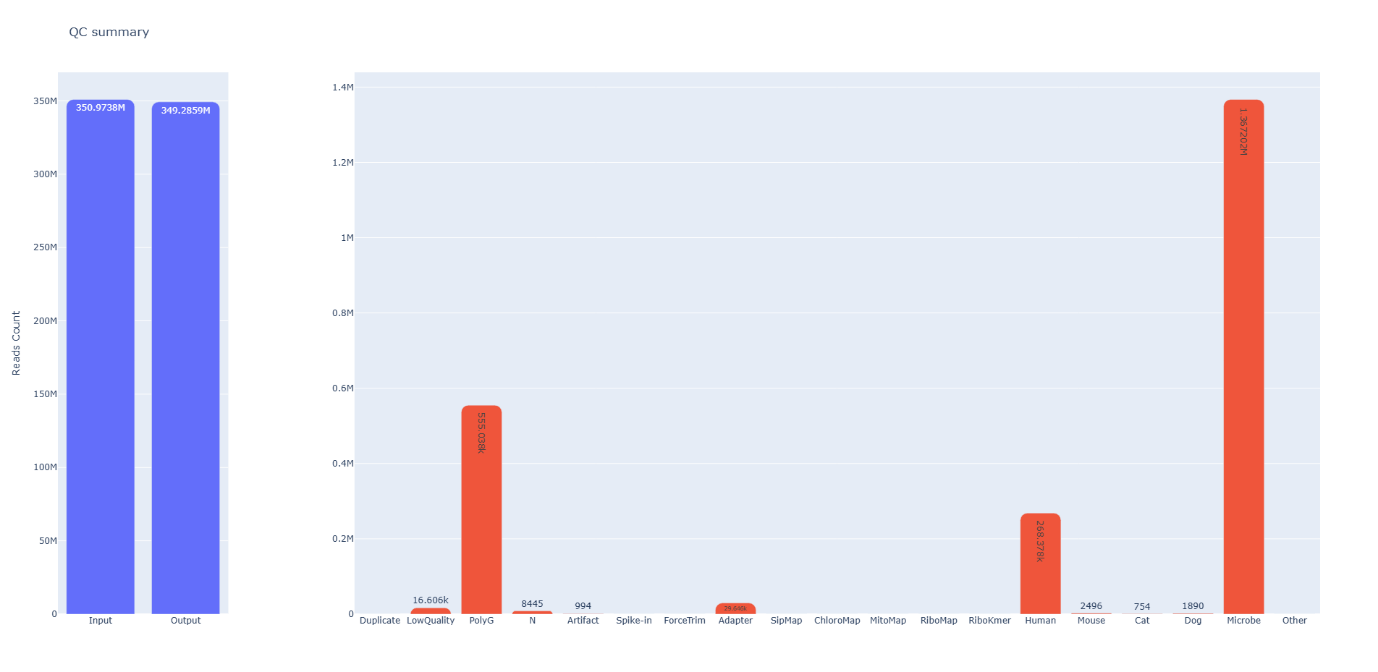


## Fig S3. Non-tick read QC.

Summary composition of non-tick reads after fastqc. Blue bars indicate input and output reads, while red bars indicate composition of reads after tick read filtering.


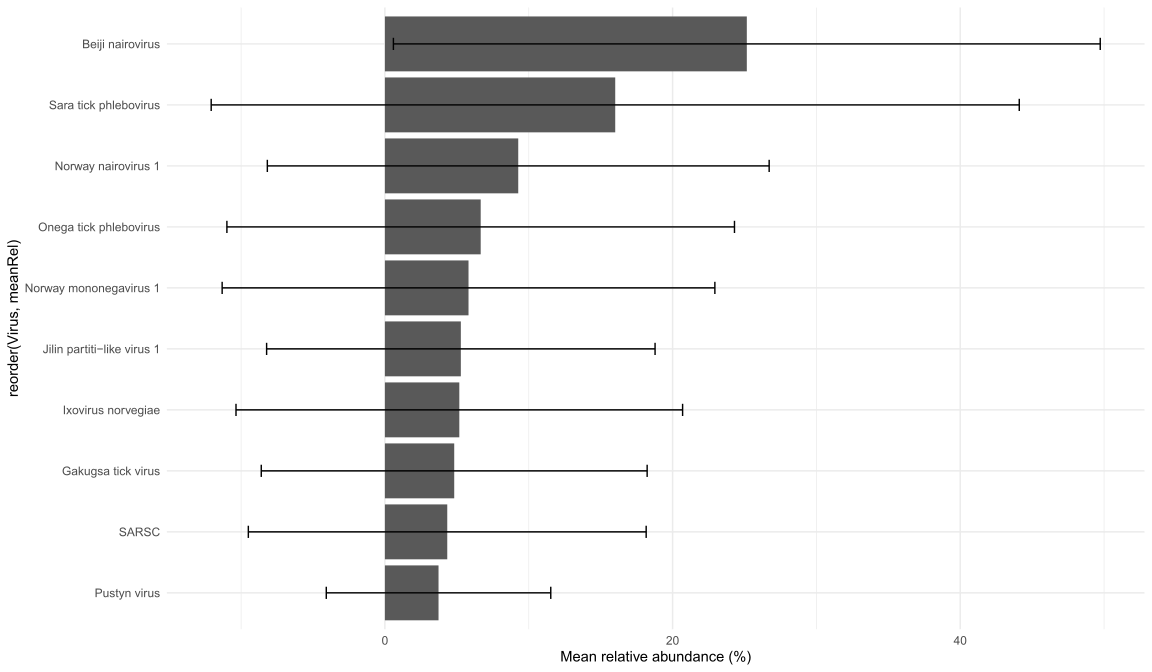


## Fig S4. Mean relative abundance

Mean relative abundance (±SD) of the top 10 viruses across all samples.


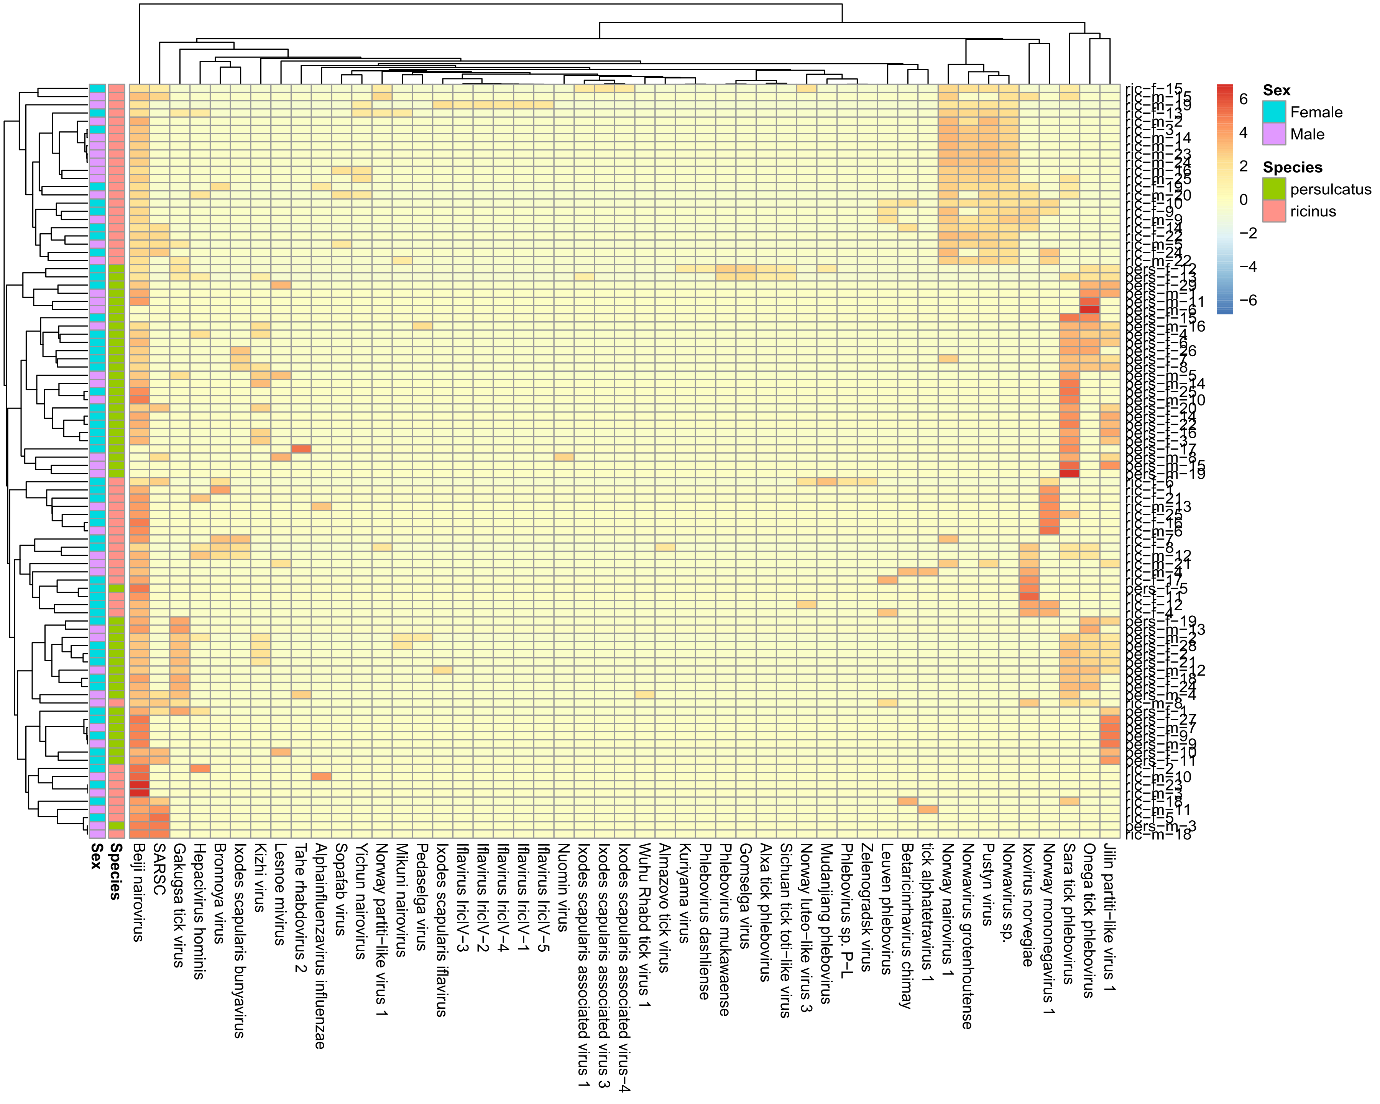


Fig S5. Heatmap of viral taxa across individual tick samples.
Hierarchical clustering heatmap showing normalized relative abundances of detected viral taxa across all individual ticks. Rows represent viruses and columns represent samples. Clustering is based on Bray-Curtis distance. Warmer colours represent higher abundance, and cooler colours indicate lower or undetected levels. Viral families such as *Nairoviridae*, *Phenuiviridae*, *Iflaviridae*, and *Rhabdoviridae*, along with several unclassified RNA viruses, are displayed on the y-axis. Hierarchical clustering reveals distinct species-specific virome profiles, with *I. persulcatus* showing enrichment of nairoviruses and phleboviruses, while *I. ricinus* harbours more iflaviruses and partiti-like viruses.

## Table S1. Viruses and their family names.

Unclassified groups were assigned to hypothetical families

| Scientific_Name | Virus_Family | |
| --- | --- | --- |
| Severe acute respiratory syndrome-related coronavirus | Coronaviridae | |
| Beiji nairovirus | Nairoviridae | |
| Gakugsa tick virus | Nairoviridae | |
| Jilin partiti-like virus 1 | Partitiviridae (unclassified) | |
| Hepacivirus hominis | Flaviviridae | |
| Lesnoe mivirus | Mivirus (Chuviridae-related) | |
| Kuriyama virus | Phenuiviridae (Phlebovirus-related) | |
| Onega tick phlebovirus | Phenuiviridae (Phlebovirus) | |
| Gomselga virus | Nairoviridae | |
| Sichuan tick toti-like virus | Totiviridae (unclassified) | |
| Alxa tick phlebovirus | Phenuiviridae (Phlebovirus) | |
| Mudanjiang phlebovirus | Phenuiviridae (Phlebovirus) | |
| Phlebovirus dashliense | Phenuiviridae (Phlebovirus) | |
| Phlebovirus mukawaense | Phenuiviridae (Phlebovirus) | |
| Ixodes scapularis associated virus 1 | Chuviridae (unclassified) | |
| Sara tick phlebovirus | Phenuiviridae (Phlebovirus) | |
| Kizhi virus | Nairoviridae | |
| Tahe rhabdovirus 2 | Rhabdoviridae | |
| Ixodes scapularis bunyavirus | Phenuiviridae (Bunyavirales unclassified) | |
| Mikuni nairovirus | Nairoviridae | |
| Ixovirus norvegiae | Ixovirus (proposed novel family within Bunyavirales) | |
| Norway nairovirus 1 | Nairoviridae | |
| Ixodes scapularis iflavirus | Iflaviridae |  |
| Pedaselga virus | Chuviridae (unclassified) | |
| Wuhu Rhabd tick virus 1 | Rhabdoviridae | |
| Nuomin virus | Chuviridae (Mivirus-related) | |
| Norway mononegavirus 1 | Mononegavirales (unclassified) | |
| Bronnoya virus | Nairoviridae | |
| Pustyn virus | Phenuiviridae (Phlebovirus) | |
| Leuven phlebovirus | Phenuiviridae (Phlebovirus) | |
| Betaricinrhavirus chimay | Rhabdoviridae | |
| Norwavirus sp. | Norwavirus (proposed genus in Bunyavirales) | |
| Norwavirus grotenhoutense | Norwavirus (proposed genus in Bunyavirales) | |
| Norway luteo-like virus 3 | Luteoviridae (unclassified) | |
| Norway partiti-like virus 1 | Partitiviridae (unclassified) | |
| Yichun nairovirus | Nairoviridae | |

## Table S2: Assembly and contig length distribution.

Length distribution of viral contigs retained after assembly and filtering thresholds.


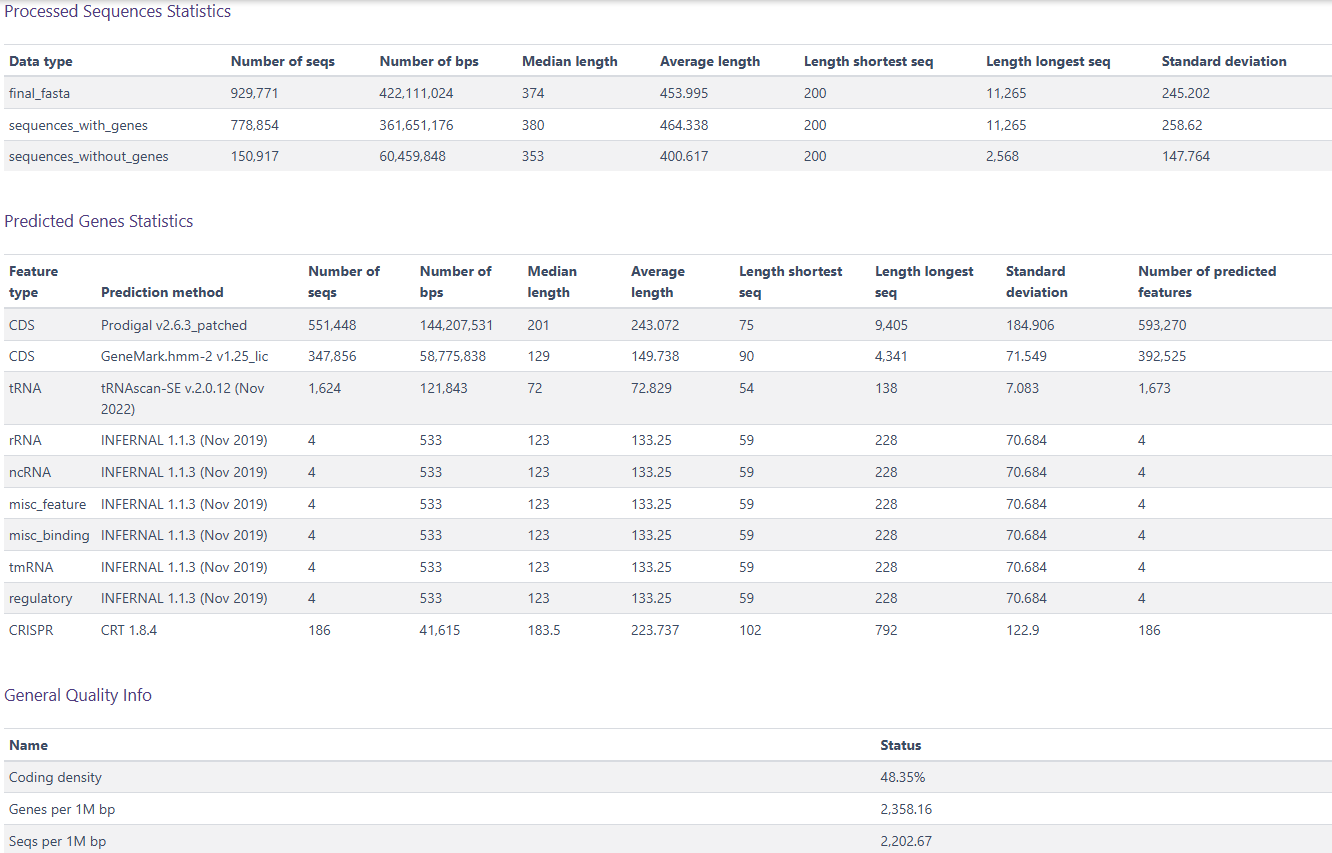


## Table S3. PERMANOVA (adonis) to test if communities differ by species/sex.

This uses Bray-Curtis dissimilarity. PERMANOVA: Permutation test for adonis under reduced model.

**(A)**

|  | Df | SumOfSqs | R2 | F | Pr(>F) |
| --- | --- | --- | --- | --- | --- |
| Model | 3 | 5.476327 | 0.158677 | 5.532369 | 0.001 |
| Residual | 88 | 29.03619 | 0.841323 |  |  |
| Total | 91 | 34.51252 | 1 |  |  |

adonis2(formula = mat_numeric ~ Species*Sex, data = meta, permutations = 999, method = "bray”

(B)

|  | Df | SumOfSqs | R2 | F | Pr(>F) |
| --- | --- | --- | --- | --- | --- |
| Model | 1 | 0.333 | 0.00964 | 0.8761 | 0.564 |
| Residual | 90 | 34.180 | 0.99036 |  |  |
| Total | 91 | 34.513 | 1.00000 |  |  |

adonis2(formula = mat_numeric ~ Sex, data = meta, permutations = 999, method = "bray")

(C)

|  | Df | SumOfSqs | R2 | F | Pr(>F) |
| --- | --- | --- | --- | --- | --- |
| Model | 1 | 4.909 | 0.14225 | 14.926 | 0.001 *** |
| Residual | 90 | 29.603 | 0.85775 |  |  |
| Total | 91 | 34.513 | 1.00000 |  |  |

adonis2(formula = mat_numeric ~ Species, data = meta, permutations = 999, method = "bray"). Signif. codes: 0 ‘***’ 0.001 ‘**’ 0.01 ‘*’ 0.05 ‘.’ 0.1 ‘ ’ 1

## Table S4. Differential abundance analysis of tick-associated RNA viruses between Ixodes ricinus and Ixodes persulcatus.

Results were generated using DESeq2 based on normalized virus read counts. The table includes log2 fold change (log2FC), standard error (lfcSE), Wald test statistic (stat), raw p-values, and Benjamini-Hochberg false discovery rate adjusted p-values (padj). Positive log2FC values indicate higher abundance in *I. ricinus*, whereas negative values indicate higher abundance in *I. persulcatus*. Viruses with adjusted p< 0.05 were considered significantly differentially abundant.

|  | baseMean | log2FoldChange | lfcSE | stat | pvalue | padj |
| --- | --- | --- | --- | --- | --- | --- |
| Norwavirus grotenhoutense | 803.1006 | -30 | 1.707863 | -17.5658 | 4.50E-69 | 9.90E-68 |
| Kizhi virus | 130.3814 | 28.92488 | 2.035808 | 14.20806 | 8.17E-46 | 8.98E-45 |
| Hepacivirus hominis | 28.97615 | -26.9786 | 2.902324 | -9.29552 | 1.46E-20 | 1.04E-19 |
| Betaricinrhavirus chimay | 27.35998 | -26.9012 | 2.902341 | -9.26879 | 1.88E-20 | 1.04E-19 |
| Leuven phlebovirus | 25.40602 | -26.7936 | 2.902364 | -9.23166 | 2.66E-20 | 1.17E-19 |
| Norway partiti-like virus 1 | 11.51606 | -25.7294 | 2.902752 | -8.86379 | 7.73E-19 | 2.84E-18 |
| Bronnoya virus | 11.78618 | -25.4975 | 2.902736 | -8.78396 | 1.58E-18 | 4.96E-18 |
| Alphainfluenzavirus influenzae | 9.420977 | -25.3523 | 2.902909 | -8.73341 | 2.47E-18 | 6.80E-18 |
| Norway luteo-like virus 3 | 7.91256 | -25.2178 | 2.903072 | -8.68658 | 3.74E-18 | 9.13E-18 |
| Sopafab virus | 2.588035 | -23.717 | 2.904711 | -8.16499 | 3.21E-16 | 7.07E-16 |
| Yichun nairovirus | 2.481369 | -23.6532 | 2.90478 | -8.14285 | 3.86E-16 | 7.72E-16 |
| Jilin partiti-like virus 1 | 5787.666 | 10.91117 | 1.367905 | 7.976552 | 1.50E-15 | 2.76E-15 |
| Pustyn virus | 1350.358 | -10.0407 | 1.592599 | -6.30458 | 2.89E-10 | 4.89E-10 |
| Onega tick phlebovirus | 2551.521 | 7.222458 | 1.622422 | 4.451651 | 8.52E-06 | 1.34E-05 |
| Sara tick phlebovirus | 14192.34 | 5.165817 | 1.25905 | 4.102949 | 4.08E-05 | 5.98E-05 |
| Gakugsa tick virus | 8410.301 | 7.800873 | 2.08697 | 3.737894 | 0.000186 | 0.000255 |
| Norwavirus sp. | 607.1385 | -5.28658 | 1.713529 | -3.0852 | 0.002034 | 0.002632 |
| Norway nairovirus 1 | 3545.221 | -4.76501 | 1.688826 | -2.8215 | 0.00478 | 0.005842 |
| Norway mononegavirus 1 | 2253.883 | -7.26552 | 2.754858 | -2.63735 | 0.008356 | 0.009675 |
| Ixovirus norvegiae | 933.6262 | -5.26846 | 2.212906 | -2.38079 | 0.017276 | 0.019003 |
| SARSC | 1535.877 | -3.58827 | 2.175584 | -1.64934 | 0.099078 | 0.103797 |
| Beiji nairovirus | 31208.43 | 0.512373 | 0.544193 | 0.941527 | 0.346435 | 0.346435 |
